# Supplementary material
Source: HighWire-hosted journal article supplement (https://erj.ersjournals.com/content/59/4/2102879)
Supplement: inline-supplementary-material-1 [file inline-supplementary-material-1.pdf]

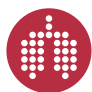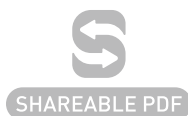

# CPAnet: the challenges of gaining evidence-based knowledge in chronic pulmonary aspergillosis

Rosanne Sprute <sup>1,2,3</sup>, Helmut J.F. Salzer<sup>4</sup> and Danila Seidel<sup>1,2,3</sup>

<sup>1</sup>Dept of Internal Medicine, Faculty of Medicine and University of Cologne, Excellence Center for Medical Mycology (ECMM), University of Cologne, Cologne, Germany. <sup>2</sup>Cologne Excellence Cluster on Cellular Stress Responses in Aging-Associated Diseases (CECAD), University of Cologne, Cologne, Germany. <sup>3</sup>German Centre for Infection Research (DZIF), Partner Site Bonn-Cologne, Cologne, Germany. <sup>4</sup>Dept of Internal Medicine/Pulmonology, Kepler University Hospital, Linz, Austria.

Corresponding author: Rosanne Sprute ([rosanne.sprute@uk-koeln.de](mailto:rosanne.sprute@uk-koeln.de))

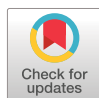

Shareable abstract (@ERSpublications)

**Chronic pulmonary aspergillosis is a destructive fungal disease complicating many respiratory disorders. Evidence is scarce for clinical management decisions. CPAnet aims to improve patient care by collecting data in an international registry.** <https://bit.ly/3utUFH1>

**Cite this article as:** Sprute R, Salzer HJF, Seidel D. CPAnet: the challenges of gaining evidence-based knowledge in chronic pulmonary aspergillosis. *Eur Respir J* 2022; 59: 2102879 [DOI: 10.1183/13993003.02879-2021].

This single-page version can be shared freely online.

Copyright ©The authors 2022.  
For reproduction rights and  
permissions contact  
[permissions@ersnet.org](mailto:permissions@ersnet.org)

Received: 7 Nov 2021  
Accepted: 1 Feb 2022

The term chronic pulmonary aspergillosis (CPA) is used to describe a wide range of severe chronic fungal infections mainly occurring in non-immunocompromised patients with pre-existing lung disease [1]. CPA is a long-term infection of the lung caused by moulds of the genus *Aspergillus*. In Europe, the majority of cases are caused by *A. fumigatus*. About three million people are diagnosed with CPA globally, mostly complicating tuberculosis, allergic bronchopulmonary aspergillosis (ABPA) or sarcoidosis [2].
